# Supplementary material for: Enhancing electrocatalytic activity in metallic thin films through surface segregation of carbon
Source: Royal Society of Chemistry journal article supplement (doi:10.1039/d3cp04316a), 2023-12-12
Supplement: d3cp04316a1.pdf [file d3cp04316a1.pdf]

## Enhancing Electrocatalytic Activity in Metallic Thin Films through Surface Segregation of Carbon

Ayesha Kousar<sup>a</sup>, Ulviyya Quliveya<sup>a</sup>, Ishan Pande<sup>a</sup>, Jani Sainio<sup>b</sup>, Jaakko Julin<sup>c</sup>, Timo Sajavaara<sup>c</sup>, Antti Karttunen<sup>d</sup>, Tomi Laurila<sup>a, d\*</sup>

<sup>a</sup> Department of Electrical Engineering and Automation, School of Electrical Engineering, Aalto University, PO Box 13500, 00076 Aalto, Finland

<sup>b</sup> Department of Applied Physics, School of Science, Aalto University, PO Box 15100, 00076 Aalto, Finland

<sup>c</sup> Department of Physics, University of Jyväskylä, PO Box 35 FI-40014, Finland.

<sup>d</sup> Department of Chemistry and Materials Science, School of Chemical Engineering, Aalto University, PO Box 16200, 00076 Aalto, Finland

### Electronic Supplementary Information

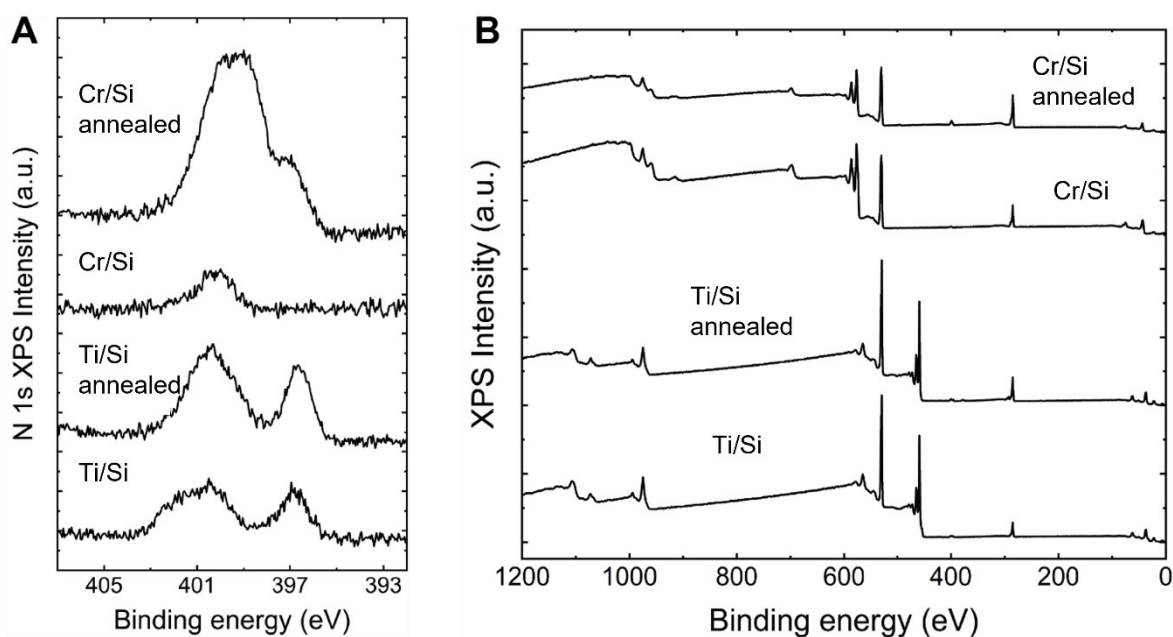

**Fig S1.** X-ray photoelectron of (A) N 1s spectra (B) survey spectra of Cr and Ti samples.

**Table S1.** The atomic percentages (at-%) of the elements for Cr and Ti samples including peak fitting results. The error associated with each value is roughly  $\pm 10\%$  of the value.

| <b>Element</b>                          | <b>Cr/Si</b> | <b>Cr/Si annealed</b> | <b>Ti/Si</b> | <b>Ti/Si annealed</b> |
|-----------------------------------------|--------------|-----------------------|--------------|-----------------------|
| <b>C of which</b>                       | <b>31.1</b>  | <b>46.7</b>           | <b>20.4</b>  | <b>29.1</b>           |
| sp <sup>2</sup> C                       | 0.3          | 11.1                  | -            | -                     |
| sp <sup>3</sup> C / sp <sup>2</sup> C–N | 22.0         | 21.8                  | 13.8         | 21.5                  |
| C–O–C / C–OH / sp <sup>3</sup> C–N      | 2.8          | 5.5                   | 3.2          | 3.8                   |
| C=O                                     | 2.3          | 4.9                   | 0.9          | 1.7                   |
| O–C=O                                   | 3.7          | 3.5                   | 2.5          | 2.1                   |
| p–p*                                    | ~0           | 0.8                   | -            | -                     |
| <b>O of which</b>                       | <b>44.0</b>  | <b>35.4</b>           | <b>53.7</b>  | <b>48.9</b>           |
| O–Metal                                 | 23.0         | 17.3                  | 42.7         | 39.9                  |
| O=C                                     | 16.1         | 13.8                  | 8.4          | 6.4                   |
| O–C / OH–C                              | 4.9          | 4.3                   | 2.6          | 2.6                   |
| <b>Cr</b>                               | <b>24.3</b>  | <b>13.1</b>           | -            | -                     |
| <b>Ti</b>                               | -            | -                     | <b>24.2</b>  | <b>19.6</b>           |
| <b>N</b>                                | <b>0.6</b>   | <b>4.8</b>            | <b>1.7</b>   | <b>2.2</b>            |
| <b>Si</b>                               | -            | -                     | -            | <b>0.2</b>            |

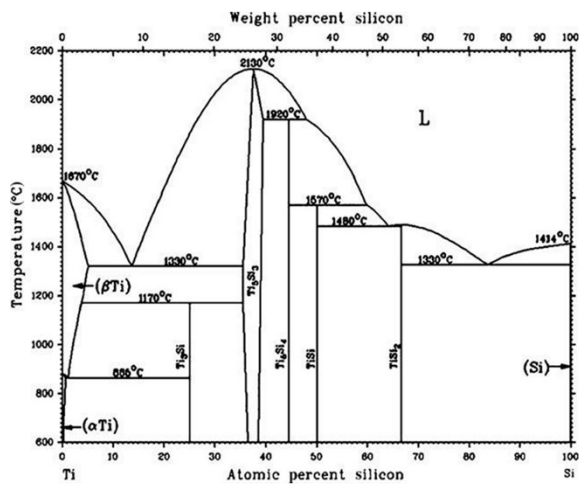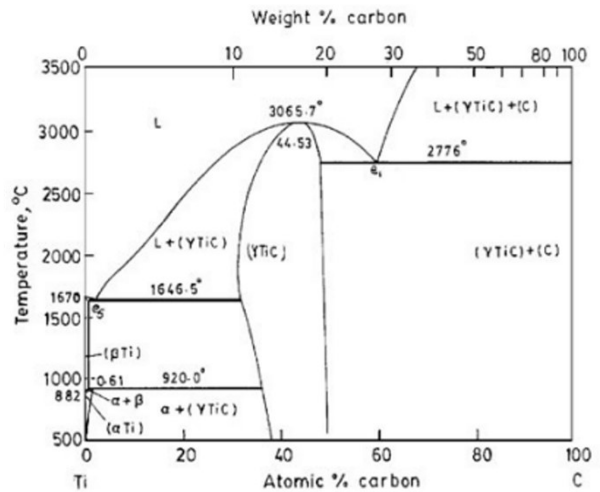

Figure S2: Ti-Si<sup>1</sup> and Ti-C<sup>2</sup> phase diagram

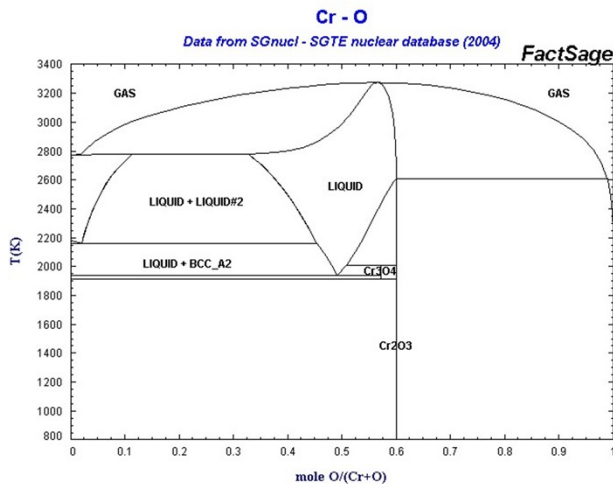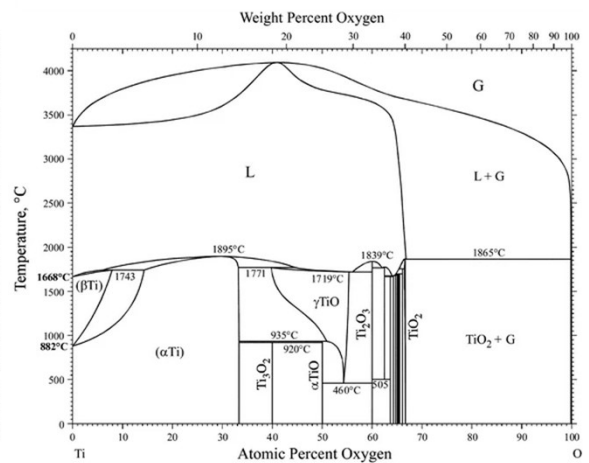

Figure S3. Cr-O and TiO phase diagrams<sup>2</sup>

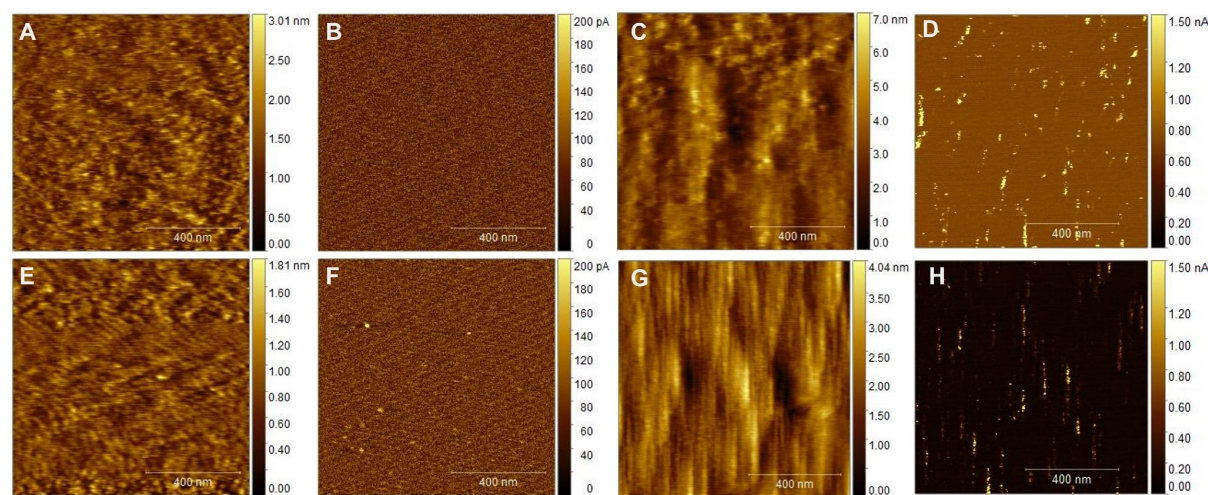

Figure S4. Topography and conductive afm micrographs for (A, B) Cr/Si, (C, D) Cr/Si annealed (E, F) Ti/Si (G, H) Ti/Si annealed. Applied bias: 3V

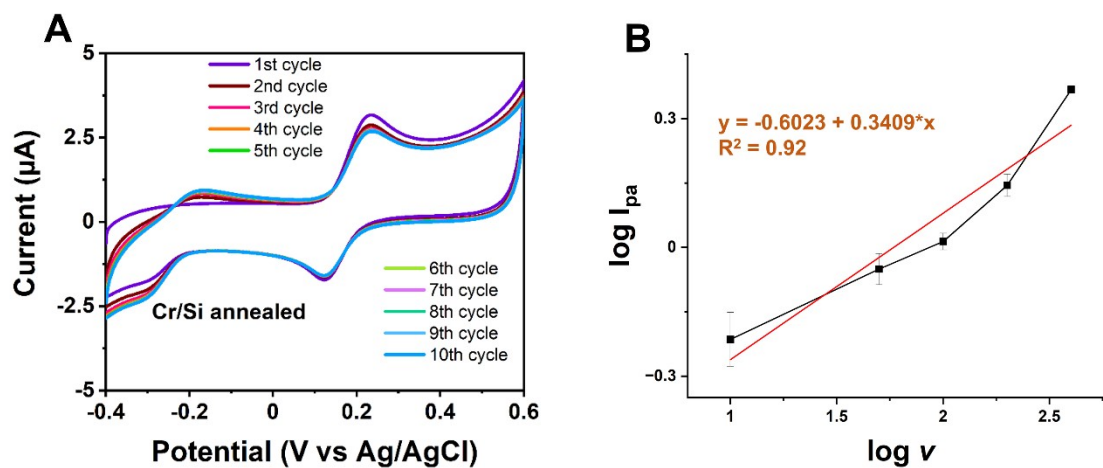

Figure S5. (A) Cyclic voltammetric response of Cr/Si annealed electrode in 100  $\mu\text{M}$  DA for 10 cycles at 100 mV/s scan rate. (B) Linear fit of  $\log I_{pa}$  vs  $\log \nu$  for Cr/Si annealed electrode in 100  $\mu\text{M}$  DA in the range of scan rates of 10 mV/s-400 mV/s.

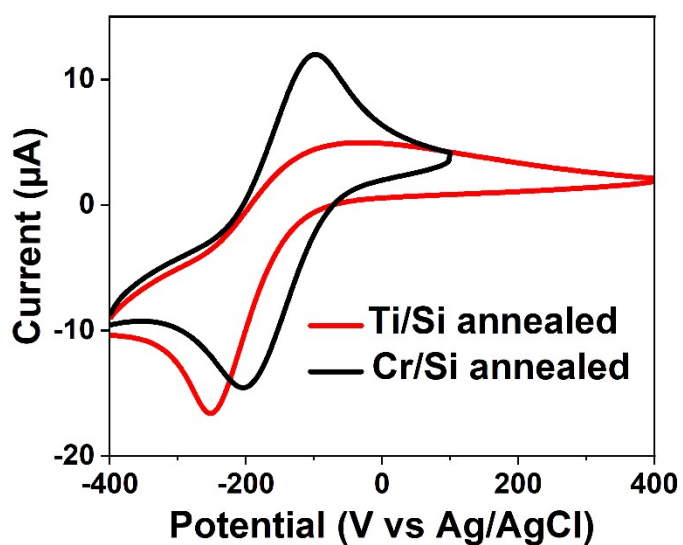

Figure S6. Cyclic voltammetry response of annealed Ti/Si and Cr/Si in 1mM  $\text{Ru}(\text{NH}_3)_6\text{Cl}$  in KCl at 100 mV/s.

#### References

- (1) Sabooni, S.; Karimzadeh, F.; Abbasi, M. H. Thermodynamic Aspects of Nanostructured Ti<sub>5</sub>Si<sub>3</sub> Formation during Mechanical Alloying and Its Characterization. *Bull. Mater. Sci.* **2012**, *35*, 439–447.
- (2) Bandyopadhyay, D.; Sharma, R. C.; Chakraborti, N. The Ti-Co-C System (Titanium-Cobalt-Carbon). *J. phase equilibria* **2000**, *21* (2), 179.
- (3) Wiczerzak, K.; Bała, P.; Stłkpień, M.; Cios, G.; Kozieł, T. The Characterization of Cast Fe-Cr-C Alloy. *Arch. Metall. Mater.* **2015**, *60*.
